# Supplementary material for: Performance enhancing additives for reusable ruthenium-triphos catalysts in the reduction of CO2to dimethoxymethane
Source: Royal Society of Chemistry journal article supplement (doi:10.1039/d0gc02528c), 2020-01-01
Supplement: d0gc02528c1.pdf [file d0gc02528c1.pdf]

## Table of contents

|                                                                                                             |    |
|-------------------------------------------------------------------------------------------------------------|----|
| General information .....                                                                                   | 2  |
| Synthesis of [RuH(CO) <sub>2</sub> (triphos)]OTf ( <b>5</b> ).....                                          | 3  |
| Synthesis of [PPh <sub>3</sub> CH <sub>2</sub> OH]OTf ( <b>7</b> ) .....                                    | 5  |
| General Procedure for large scale optimization experiments at hte GmbH .....                                | 6  |
| General procedure for CO <sub>2</sub> hydrogenation experiments at CaRLa (Heidelberg) .....                 | 12 |
| <i>In-situ</i> NMR study of <b>5</b> in the presence of P(OPh) <sub>3</sub> and H <sub>2</sub> .....        | 19 |
| General procedure for catalyst recycling experiments .....                                                  | 20 |
| Recycling of catalyst system <b>1</b> /Al(OTf) <sub>3</sub> without additive.....                           | 20 |
| Recycling of catalyst system <b>3</b> /Al(OTf) <sub>3</sub> without additive.....                           | 21 |
| Recycling of catalyst system <b>3</b> /Al(OTf) <sub>3</sub> without additive at low catalyst loading .....  | 22 |
| Recycling of catalyst system <b>1</b> /Al(OTf) <sub>3</sub> with additives PPh <sub>3</sub> and HCOOH ..... | 22 |
| References.....                                                                                             | 23 |

## General information

Chemicals were purchased from commercial suppliers and used as received. Ruthenium complexes **1**,<sup>1</sup> **2**,<sup>2</sup> **3**<sup>3</sup> and **8**<sup>4</sup> were synthesized according to literature procedures. The synthesis of [PPh<sub>3</sub>CH<sub>2</sub>OCH<sub>3</sub>]<sub>3</sub>OTf was adapted from a previous report.<sup>5</sup> Dry solvents were purchased from Sigma-Aldrich and stored over 4 Å molecular sieves. Reactions requiring inert conditions were carried out in an MBraun glovebox or in flame-dried glassware under an atmosphere of argon using standard Schlenk-techniques. Reaction gases carbon dioxide (N35) and hydrogen (ALPHAGAZ™ 1) were supplied by Air Liquide and used without further purification. NMR spectra were, if not mentioned otherwise, recorded at room temperature on the following spectrometers: Bruker Avance-III-300. Chemical shifts were given in ppm and coupling constants in Hz. <sup>1</sup>H and <sup>13</sup>C spectra were calibrated in relation to deuterated solvents. <sup>31</sup>P chemical shifts are reported relative to an external standard of phosphoric acid 30% in D<sub>2</sub>O (0.0 ppm). The following abbreviations were used for <sup>1</sup>H NMR spectra to indicate the signal multiplicity: s (singlet), bs (broad singlet), d (doublet), t (triplet) and m (multiplet) as well as combinations of them. All <sup>31</sup>P NMR spectra were measured with <sup>1</sup>H-decoupling. All <sup>13</sup>C NMR spectra were measured with <sup>31</sup>P-decoupling. HR-MS was determined at the chemistry department of the University of Heidelberg under the direction of Dr. J. Gross. For ESI<sup>+</sup>-spectra a Bruker ApexQe FT-ICR spectrometer was applied.

## Synthesis of [RuH(CO)<sub>2</sub>(triphos)]OTf (5)

### Method A

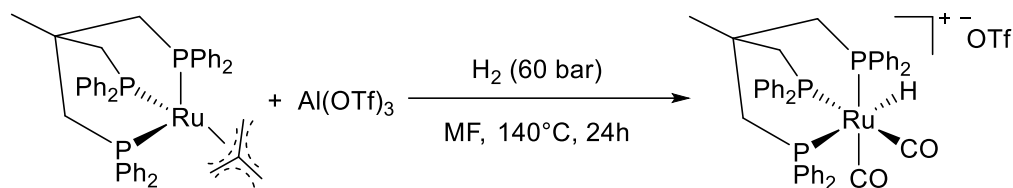

[Ru(triphos)(tmm)] (76 mg, 96 μmol) and Al(OTf)<sub>3</sub> (46 mg, 96 μmol) were weighed into a teflon insert fitted with a magnetic stirrer bar and placed into a stainless steel 40 mL Premex autoclave. 5 mL of methyl formate (MF) were added and the vessel was tightly closed and purged with H<sub>2</sub> (3x10 bar) and finally pressurized with H<sub>2</sub> (60 bar). The autoclave was heated in an aluminum block to 140 °C and stirred at 800 rpm for 24 h. The autoclave was cooled to 0°C in an ice bath then carefully vented. All volatiles were removed and the remaining solid was washed with pentane (3x5 mL) and dried *in vacuo* affording a yellow solid.

### Method B

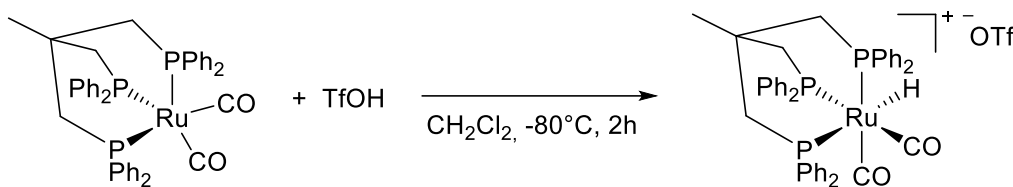

[Ru(CO)<sub>2</sub>(triphos)] (**8**) (154 mg, 0.20 μmol, 1.0 equiv.) was dissolved in 8 mL of dichloromethane and the solution was cooled to -70°C. Triflic acid (17.4 μL, 0.20 mmol, 1.0 equiv.) was added slowly and the solution was kept at -70°C for 30 minutes before being warmed to room temperature and stirred for another 1.5 hours. The volume was reduced to 2 mL and 15 mL of *n*-pentane was added giving a yellow precipitate. The solid was separated, washed with 10 mL of pentane and dried *in vacuo* affording a light yellow solid (162 mg, 88%).

<sup>1</sup>H NMR (300 MHz, D<sub>3</sub>COD) δ = 7.70-7.58 (m, 8H, Ar-CH), 7.47-6.90 (m, 22H, Ar-CH), 2.83 (d, *J* = 9.4 Hz, 2H, CH<sub>2</sub>), 2.65-2.63 (m, 4H, CH<sub>2</sub>), 1.84-1.81 (m, 3H, CH<sub>3</sub>), -6.70 (dt, <sup>2</sup>*J*<sub>HP</sub> = 64.4, 15.2 Hz, 1H, RuH) ppm.

<sup>13</sup>C{<sup>31</sup>P} NMR (151 MHz, CD<sub>2</sub>Cl<sub>2</sub>) δ = 197.1 (2xCO), 135.5, 133.8, 132.4, 131.4, 131.1, 131.0, 131.0, 129.8, 129.2, 129.1, 38.3, 32.3, 31.8 ppm.

<sup>19</sup>F NMR (283 MHz, D<sub>3</sub>COD) δ = -79.9 ppm.

<sup>31</sup>P NMR (122 MHz, D<sub>3</sub>COD) δ = 18.1 (d, <sup>2</sup>*J*<sub>PP</sub> = 28.7 Hz, 2P), 6.0 (t, <sup>2</sup>*J*<sub>PP</sub> = 28.7 Hz, 1P) ppm.

HR-MS (ESI, pos., in CH<sub>2</sub>Cl<sub>2</sub>/MeOH) calculated for [C<sub>43</sub>H<sub>40</sub>O<sub>2</sub>P<sub>3</sub>Ru]<sup>+</sup>: *m/z* = 783.1285; found: *m/z* = 783.1321.

The analytical data is in line with literature reports.<sup>6,7</sup>

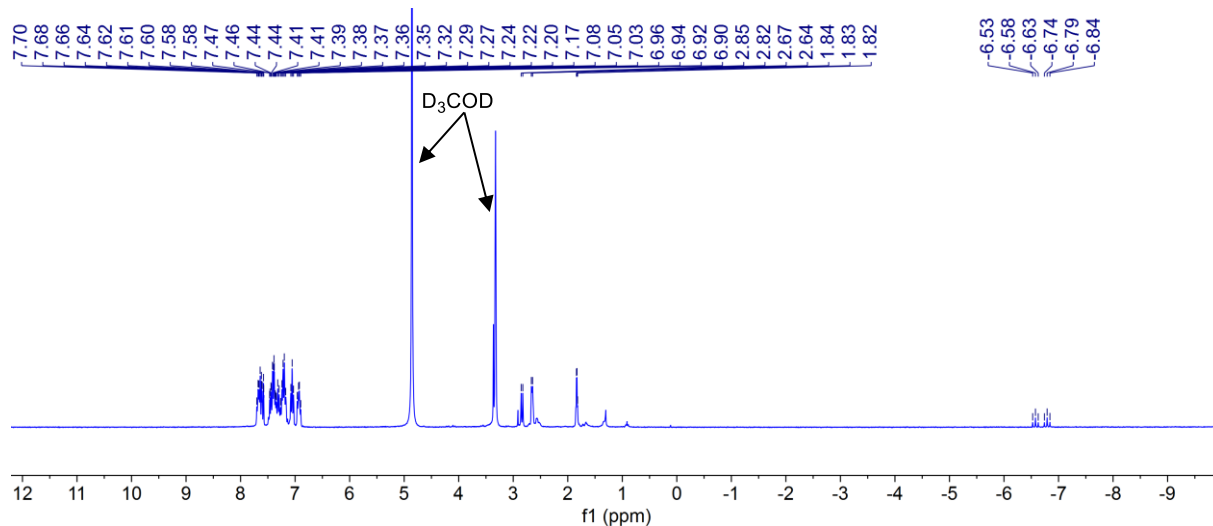

**Figure 1**  $^1\text{H}$  NMR (300 MHz,  $\text{D}_3\text{COD}$ ) spectrum of Ru-complex **5**.

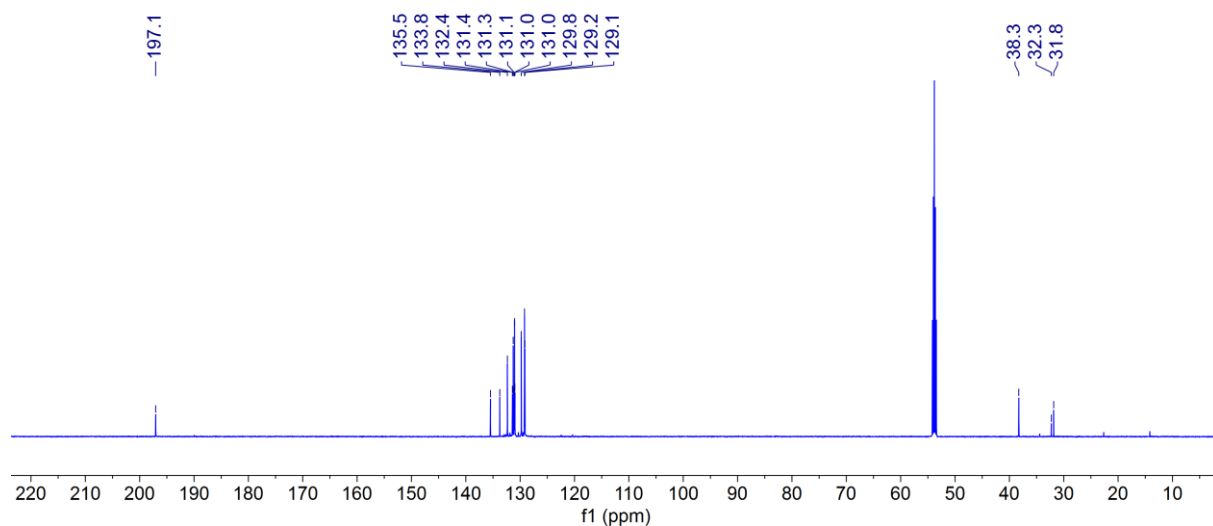

**Figure 2**  $^{13}\text{C}\{^{31}\text{P}\}$  NMR (151 MHz,  $\text{CD}_2\text{Cl}_2$ ) spectrum of Ru-complex **5**.

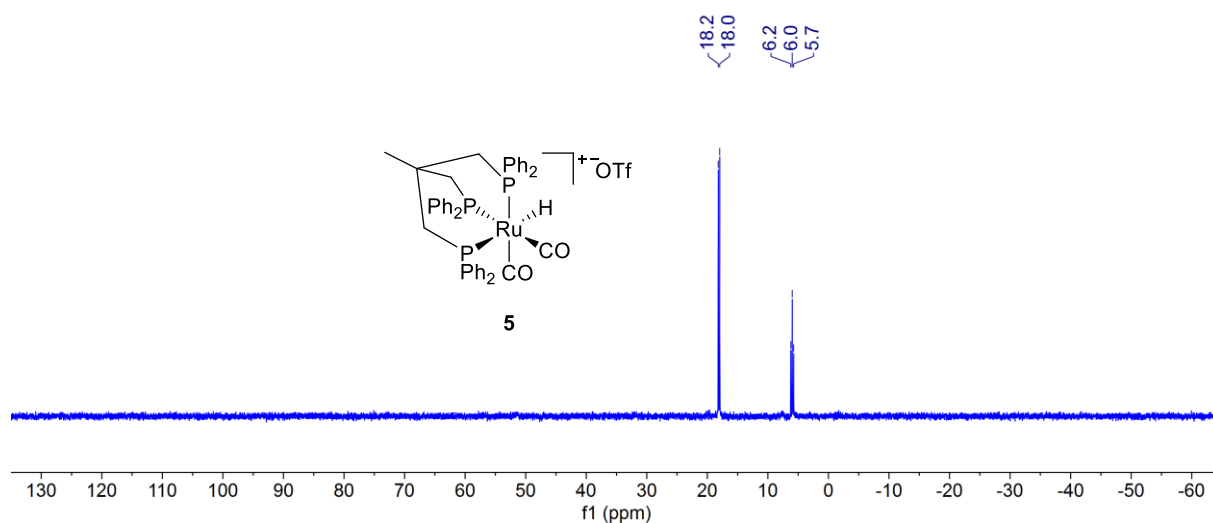

**Figure 3**  $^{31}\text{P}$  NMR (121 MHz,  $\text{D}_3\text{COD}$ ) spectrum of Ru-complex **5**.

### Synthesis of [PPh<sub>3</sub>CH<sub>2</sub>OH]OTf (7)<sup>8</sup>

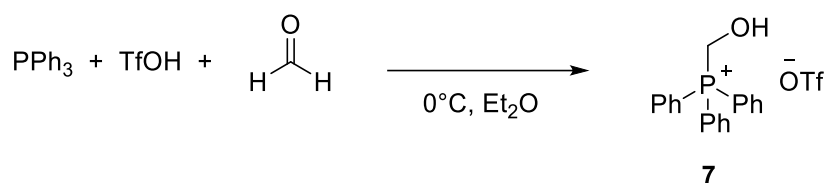

PPh<sub>3</sub> (1.0 g, 3.81 mmol) and formaldehyde (37% solution in water, 0.57 mL, 7.62 mmol) were dissolved in 20 mL of diethyl ether and cooled to 0°C. TfOH (0.68 mL, 7.62 mmol) was added slowly leading to the instant formation of a white precipitate. The mixture was warmed to room temperature and stirred overnight. The precipitate was filtered and washed with diethyl ether (3x10 mL) and dried *in vacuo* affording a white crystalline solid (1.37 g, 81%).

<sup>1</sup>H NMR (300 MHz, CDCl<sub>3</sub>) δ = 7.85-7.79 (m, 3H, Ar-CH), 7.73-7.66 (m, 12H, Ar-CH), 5.41 (s, 2H, CH<sub>2</sub>) ppm.

<sup>31</sup>P NMR (122 MHz, CDCl<sub>3</sub>) δ = 17.2 (s) ppm.

The analytical data is in line with literature reports.<sup>8</sup>

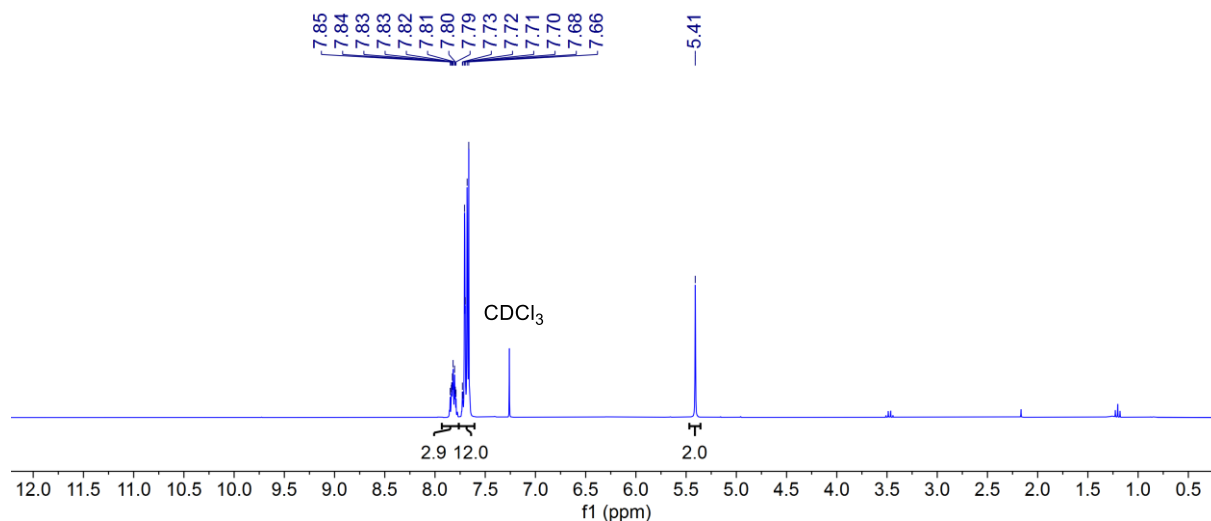

**Figure 4** <sup>1</sup>H NMR (300 MHz, CDCl<sub>3</sub>) spectrum of **7**.

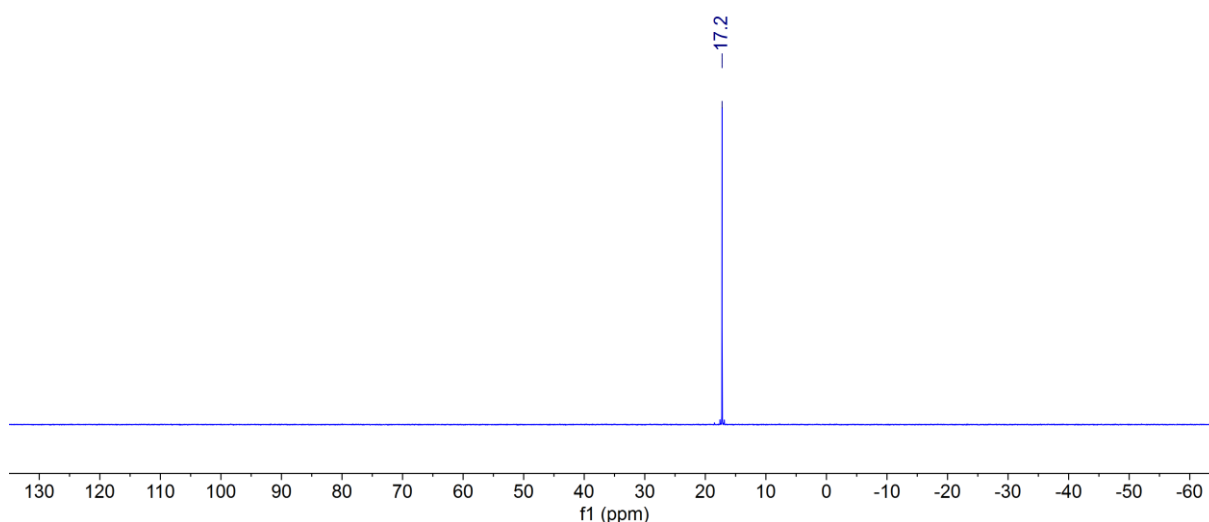

**Figure 5**  $^{31}\text{P}$  NMR (121 MHz,  $\text{CDCl}_3$ ) spectrum of **7**.

## General Procedure for large scale optimization experiments at hte GmbH

### *Experimental setup and description of experiments in the liquid phase*

Screening tests were carried out in 8 parallel steel autoclave reactors (inner volume 300 mL). The general experimental procedure for each screening experiment was as follows: in a first step, a starting reaction mixture was prepared by filling 79.2 g (100 mL) of solvent, **1** (90 mg, 125  $\mu\text{mol}$ ), acid co-catalyst  $\text{Al}(\text{OTf})_3$  (237 mg, 500  $\mu\text{mol}$ ), and additive  $\text{P}(\text{OPh})_3$  (155 mg, 500  $\mu\text{mol}$ ), into a steel autoclave reactor (inner volume 300 mL). In a second step, the filled steel autoclave reactor was tightly sealed and pressurized with 100 bar  $\text{H}_2$  and 20 bar  $\text{CO}_2$  (total pressure of 120 bar) and the steel autoclave reactor was heated to a temperature of 100  $^\circ\text{C}$  while stirring at 2000 rpm. After the corresponding reaction temperature was reached, the reaction temperature was maintained for given reaction time, while continuing stirring the reaction mixture inside the heated and pressurized steel autoclave reactor. Subsequently, the steel autoclave reactor was allowed to cool down to room temperature (approximately 22  $^\circ\text{C}$ ), the pressure was released and the steel autoclave reactor was opened. For further analysis, 1 mL of the resulting reaction mixture was subjected to GC/FID/MS analysis to quantify said reaction products.

**GC Method:** Column: Varian CP7475 CP-Sil 5 CB; 60m\*320 $\mu\text{m}$ \*8 $\mu\text{m}$ , Injection volume: 1  $\mu\text{L}$ , Inlet: 250  $^\circ\text{C}$ , Split: 20:1, Flow: 5 mL/min constant flow, Oven: start temp. 40  $^\circ\text{C}$  hold for 3 minutes, 20  $^\circ\text{C}/\text{min}$  to 225  $^\circ\text{C}$  hold for 8.25 min.

**Table 1** Screening of acid co-catalysts.

$\text{CO}_2 + \text{H}_2 + \text{CH}_3\text{OH} \xrightarrow[80^\circ\text{C}]{\text{1 acid}}$ 
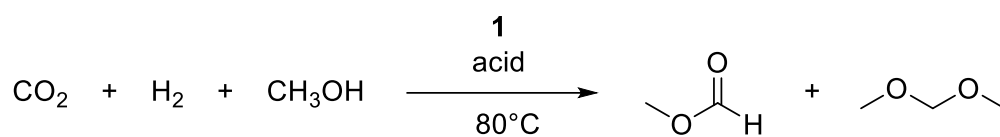

| Entry | Acid                           | TON <sup>[a]</sup> |     | Selectivity <sub>DMM</sub> <sup>[a]</sup> |
|-------|--------------------------------|--------------------|-----|-------------------------------------------|
|       |                                | MF                 | DMM |                                           |
| 1     | HNTf <sub>2</sub>              | 54                 | 0   | 0%                                        |
| 2     | Fe(OTf) <sub>3</sub>           | 200                | 8   | 4%                                        |
| 3     | Sc(OTf) <sub>3</sub>           | 365                | 76  | 17%                                       |
| 4     | H <sub>2</sub> SO <sub>4</sub> | 71                 | 0   | 0%                                        |
| 5     | Nafion-H                       | 7                  | 1   | 6%                                        |
| 6     | p-TSA                          | 33                 | 0   | 0%                                        |
| 7     | Al(OTf) <sub>3</sub>           | 373                | 94  | 20%                                       |

General conditions: [Ru] = **1** (125 μmol), acid (125 μmol), MeOH (100 mL), CO<sub>2</sub> (20 bar), H<sub>2</sub> (60 bar), 80°C, 16 h; [a] determined by GC analysis.

**Table 2** Screening of reaction temperature.

$\text{CO}_2 + \text{H}_2 + \text{CH}_3\text{OH} \xrightarrow[80^\circ\text{C}, 16\text{ h}]{\text{1 Al(OTf)}_3}$ 
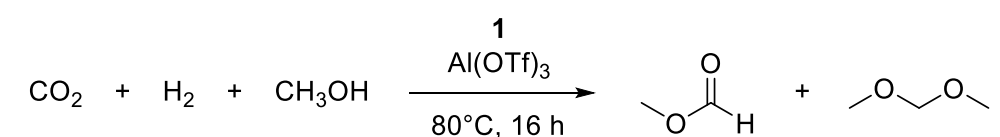

| Entry | Temperature [°C] | TON <sup>[a]</sup> |     | Selectivity <sub>DMM</sub> <sup>[a]</sup> |
|-------|------------------|--------------------|-----|-------------------------------------------|
|       |                  | MF                 | DMM |                                           |
| 1     | 60               | 160                | 3   | 2%                                        |
| 2     | 70               | 313                | 26  | 7%                                        |
| 3     | 80               | 392                | 91  | 18%                                       |
| 4     | 90               | 343                | 207 | 37%                                       |
| 5     | 100              | 229                | 313 | 57%                                       |
| 6     | 110              | 165                | 365 | 68%                                       |
| 7     | 120              | 137                | 303 | 68%                                       |
| 8     | 130              | 135                | 218 | 61%                                       |
| 9     | 140              | 105                | 169 | 61%                                       |
| 10    | 160              | 89                 | 54  | 37%                                       |

General conditions: [Ru] = **1** (125 μmol), Al(OTf)<sub>3</sub> (125 μmol), MeOH (100 mL), CO<sub>2</sub> (20 bar), H<sub>2</sub> (60 bar), 16 h; [a] determined by GC analysis.

**Table 3** Screening of catalyst concentration.

$\text{CO}_2 + \text{H}_2 + \text{CH}_3\text{OH} \xrightarrow[80^\circ\text{C}, 16\text{ h}]{\text{1, Al(OTf)}_3}$ 
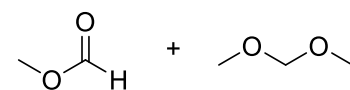

| Entry | 1<br>[ $\mu\text{mol}$ ] | TON <sup>[a]</sup> |     |       | Selectivity <sub>DMM</sub> <sup>[a]</sup> |
|-------|--------------------------|--------------------|-----|-------|-------------------------------------------|
|       |                          | MF                 | DMM | HCOOH |                                           |
| 1     | 12,5                     | 198                | 0   | 98    | 0%                                        |
| 2     | 25                       | 332                | 2   | 61    | 1%                                        |
| 3     | 50                       | 749                | 179 | 21    | 18%                                       |
| 4     | 75                       | 546                | 442 | 9     | 43%                                       |
| 5     | 100                      | 313                | 504 | 5     | 60%                                       |
| 6     | 125                      | 232                | 467 | 4     | 65%                                       |
| 7     | 150                      | 168                | 436 | 3     | 71%                                       |
| 8     | 175                      | 134                | 408 | 2     | 74%                                       |

General conditions: Al(OTf)<sub>3</sub> (125  $\mu\text{mol}$ ), MeOH (100 mL), CO<sub>2</sub> (20 bar), H<sub>2</sub> (100 bar), 16 h; [a] determined by GC analysis.

**Table 4** Screening of acid co-catalyst concentration.

$\text{CO}_2 + \text{H}_2 + \text{CH}_3\text{OH} \xrightarrow[80^\circ\text{C}, 16\text{ h}]{\text{1, Al(OTf)}_3}$ 
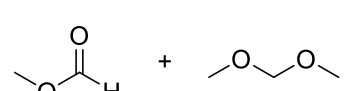

| Entry | Al(OTf) <sub>3</sub><br>[ $\mu\text{mol}$ ] | TON <sup>[a]</sup> |     | Selectivity <sub>DMM</sub> <sup>[a]</sup> |
|-------|---------------------------------------------|--------------------|-----|-------------------------------------------|
|       |                                             | MF                 | DMM |                                           |
| 1     | 12,5                                        | 18                 | 0   | 0%                                        |
| 2     | 25                                          | 24                 | 0   | 0%                                        |
| 3     | 50                                          | 1                  | 8   | 79%                                       |
| 4     | 75                                          | 202                | 144 | 40%                                       |
| 5     | 100                                         | 193                | 359 | 64%                                       |
| 6     | 125                                         | 181                | 461 | 71%                                       |
| 7     | 150                                         | 169                | 520 | 74%                                       |
| 8     | 175                                         | 159                | 564 | 78%                                       |

General conditions: [Ru] = 1 (125  $\mu\text{mol}$ ), MeOH (100 mL), CO<sub>2</sub> (20 bar), H<sub>2</sub> (100 bar), 80°C, 16 h; [a] determined by GC analysis.



**Table 5** Screening of CO<sub>2</sub>/H<sub>2</sub> ratios.

$\text{CO}_2 + \text{H}_2 + \text{CH}_3\text{OH} \xrightarrow[100^\circ\text{C}, 16 \text{ h}]{\text{1, Al(OTf)}_3}$  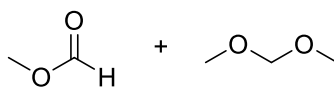

| Entry                          | H <sub>2</sub><br>[bar] | TON <sup>[a]</sup> |     | Selectivity <sub>DMM</sub> <sup>[a]</sup> |
|--------------------------------|-------------------------|--------------------|-----|-------------------------------------------|
|                                |                         | MF                 | DMM |                                           |
| <b>CO<sub>2</sub> (5 bar)</b>  |                         |                    |     |                                           |
| 1                              | 100                     | 51                 | 323 | 85%                                       |
| 2                              | 120                     | 39                 | 296 | 87%                                       |
| 3                              | 140                     | 35                 | 333 | 89%                                       |
| <b>CO<sub>2</sub> (10 bar)</b> |                         |                    |     |                                           |
| 5                              | 100                     | 81                 | 412 | 82%                                       |
| 6                              | 120                     | 83                 | 478 | 84%                                       |
| 7                              | 140                     | 75                 | 493 | 85%                                       |

General conditions: [Ru] = **1** (125 μmol), Al(OTf)<sub>3</sub> (500 μmol), MeOH (100 mL), 100°C, 16 h; [a] determined by GC analysis.

**Table 6** Screening of reaction time.

$\text{CO}_2 + \text{H}_2 + \text{CH}_3\text{OH} \xrightarrow[100^\circ\text{C}]{\text{1, Al(OTf)}_3} \text{HCO}_2\text{Me} + \text{DMM}$

| Entry | Time [h] | TON <sup>[a]</sup> |     | Selectivity <sub>DMM</sub> <sup>[a]</sup> |
|-------|----------|--------------------|-----|-------------------------------------------|
|       |          | MF                 | DMM |                                           |
| 1     | 1        | 311                | 174 | 35%                                       |
| 2     | 2        | 273                | 359 | 56%                                       |
| 3     | 3        | 255                | 451 | 63%                                       |
| 4     | 4        | 251                | 435 | 62%                                       |
| 5     | 5        | 236                | 519 | 67%                                       |
| 6     | 6        | 207                | 578 | 73%                                       |
| 7     | 7        | 208                | 610 | 74%                                       |
| 8     | 8        | 197                | 631 | 75%                                       |
| 9     | 9        | 202                | 653 | 76%                                       |
| 10    | 10       | 183                | 664 | 78%                                       |
| 11    | 11       | 186                | 680 | 78%                                       |
| 12    | 12       | 184                | 648 | 77%                                       |
| 13    | 13       | 175                | 692 | 79%                                       |
| 14    | 14       | 164                | 639 | 79%                                       |
| 15    | 15       | 165                | 671 | 80%                                       |
| 16    | 16       | 170                | 688 | 80%                                       |
| 17    | 17       | 170                | 706 | 80%                                       |
| 18    | 18       | 164                | 714 | 80%                                       |
| 19    | 36       | 129                | 714 | 84%                                       |

General conditions: [Ru] = **1** (125 μmol), Al(OTf)<sub>3</sub> (500 μmol), MeOH (100 mL), CO<sub>2</sub> (20 bar), H<sub>2</sub> (120 bar), 100°C; [a] determined by GC analysis.

**Table 7** Optimization of reaction parameters at a reaction time of 18 h.

$$\text{CO}_2 + \text{H}_2 + \text{CH}_3\text{OH} \xrightarrow[\text{Al(OTf)}_3]{\mathbf{1}} \text{HCO}_2\text{Me} + \text{DMM}$$

| Entry | <b>1</b><br>[ $\mu\text{mol}$ ] | <b>Al(OTf)<sub>3</sub></b><br>[ $\mu\text{mol}$ ] | <b>Temp.</b><br>[ $^{\circ}\text{C}$ ] | <b>p(CO<sub>2</sub>)</b><br>[bar] | <b>p(H<sub>2</sub>)</b><br>[bar] | <b>TON<sup>[a]</sup></b> |            | <b>Selectivity<sub>DMM</sub><sup>[a]</sup></b> |
|-------|---------------------------------|---------------------------------------------------|----------------------------------------|-----------------------------------|----------------------------------|--------------------------|------------|------------------------------------------------|
|       |                                 |                                                   |                                        |                                   |                                  | <b>MF</b>                | <b>DMM</b> |                                                |
| 1     | 125                             | 500                                               | 90                                     | 20                                | 90                               | 202                      | 903        | 81%                                            |
| 2     | 62.5                            | 500                                               | 90                                     | 20                                | 90                               | 486                      | 1596       | 77%                                            |
| 3     | 62.5                            | 250                                               | 90                                     | 20                                | 100                              | 636                      | 1370       | 68%                                            |
| 4     | 31.25                           | 250                                               | 90                                     | 20                                | 100                              | 1761                     | 1732       | 49%                                            |
| 5     | 31.25                           | 250                                               | 90                                     | 15                                | 100                              | 1254                     | 2025       | 62%                                            |
| 6     | 15.63                           | 62.5                                              | 90                                     | 20                                | 90                               | 4024                     | 651        | 14%                                            |

[a] Determined by GC analysis.

**Table 8** Screening of reaction time in presence of P(OPh)<sub>3</sub>.

$$\text{CO}_2 + \text{H}_2 + \text{CH}_3\text{OH} \xrightarrow[\text{P(OPh)}_3]{\text{Al(OTf)}_3, \mathbf{1}} \text{HCO}_2\text{Me} + \text{DMM}$$

100 $^{\circ}\text{C}$

| Entry | <b>Time</b><br>[h] | <b>TON<sup>[a]</sup></b> |            | <b>Selectivity<sub>DMM</sub><sup>[a]</sup></b> |
|-------|--------------------|--------------------------|------------|------------------------------------------------|
|       |                    | <b>MF</b>                | <b>DMM</b> |                                                |
| 1     | 8                  | 191                      | 857        | 81%                                            |
| 2     | 10                 | 170                      | 890        | 84%                                            |
| 3     | 12                 | 166                      | 930        | 84%                                            |
| 4     | 14                 | 171                      | 962        | 85%                                            |
| 5     | 16                 | 160                      | 913        | 85%                                            |
| 6     | 36                 | 141                      | 780        | 84%                                            |

General conditions: [Ru] = **1** (125  $\mu\text{mol}$ ), Al(OTf)<sub>3</sub> (500  $\mu\text{mol}$ ), P(OPh)<sub>3</sub> (500  $\mu\text{mol}$ ), MeOH (100 mL), CO<sub>2</sub> (20 bar), H<sub>2</sub> (120 bar), 100 $^{\circ}\text{C}$ ; [a] determined by GC analysis.

## General procedure for CO<sub>2</sub> hydrogenation experiments at CaRLa (Heidelberg)

In an argon filled glovebox, Ru-catalyst, Al(OTf)<sub>3</sub> and additive were weighed into a teflon insert fitted with a magnetic stirrer bar and placed into a stainless steel 40 mL Premex autoclave. MeOH was added and the autoclave was tightly closed before being purged with CO<sub>2</sub> (3x10 bar) and finally pressurized with CO<sub>2</sub> (20 bar) and H<sub>2</sub> (100 bar) to a total pressure of 120 bar at room temperature. The vessel was heated in an aluminum block to 100 °C (150 bar total pressure) and stirred at 800 rpm for 16-24 h (as indicated). The autoclave was cooled to 0°C in an ice bath then carefully vented. To determine the turnover number (TON) of MF and DMM, Mesitylene (30 μL) was added to the mixture as an internal standard. 0.1 mL of the resulting solution were transferred to an NMR tube with 0.5 mL of D<sub>3</sub>COD or CDCl<sub>3</sub> and analyzed by <sup>1</sup>H NMR.

All high pressure experiments were carried out in Premex reactors with 40 mL nominal volumes equipped with PTFE inserts (see figure below). **Caution:** Reactions must be carried out in a well ventilated fume hood. The used reactors must tolerate up to at least 12 times greater pressure than the working pressure.

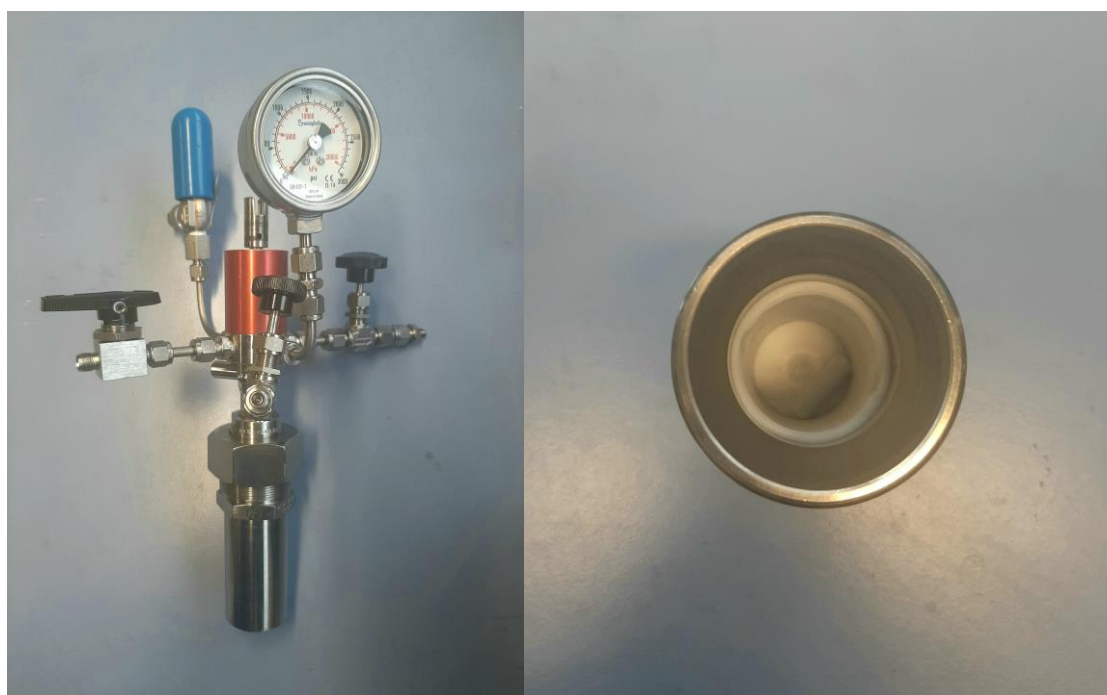

**Figure 6** Representative picture of a Premex autoclave used in high pressure reaction.

( $^1\text{H}$ , 300 MHz,  $\text{CDCl}_3$ )

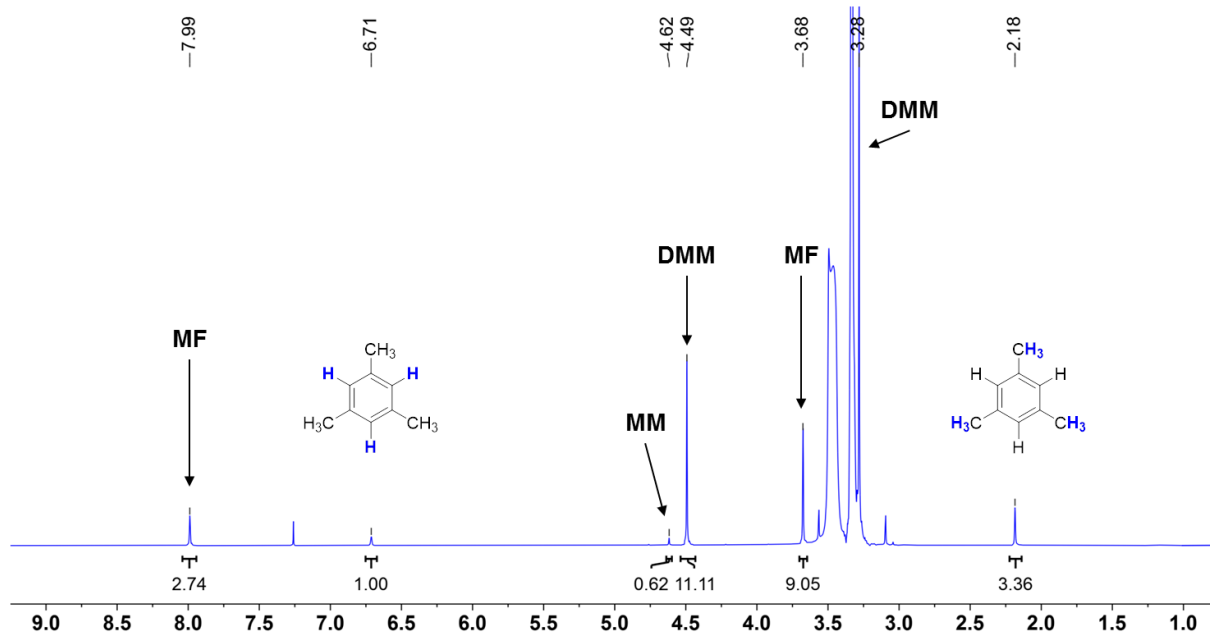

**Figure 7** Representative  $^1\text{H}$  NMR spectrum in  $\text{CDCl}_3$  (300 MHz) of a typical  $\text{CO}_2$  hydrogenation post-reaction mixture after addition of mesitylene as internal standard. MM = Methoxymethane.

( $^1\text{H}$ , 300 MHz,  $\text{MeOD-d}_4$ )

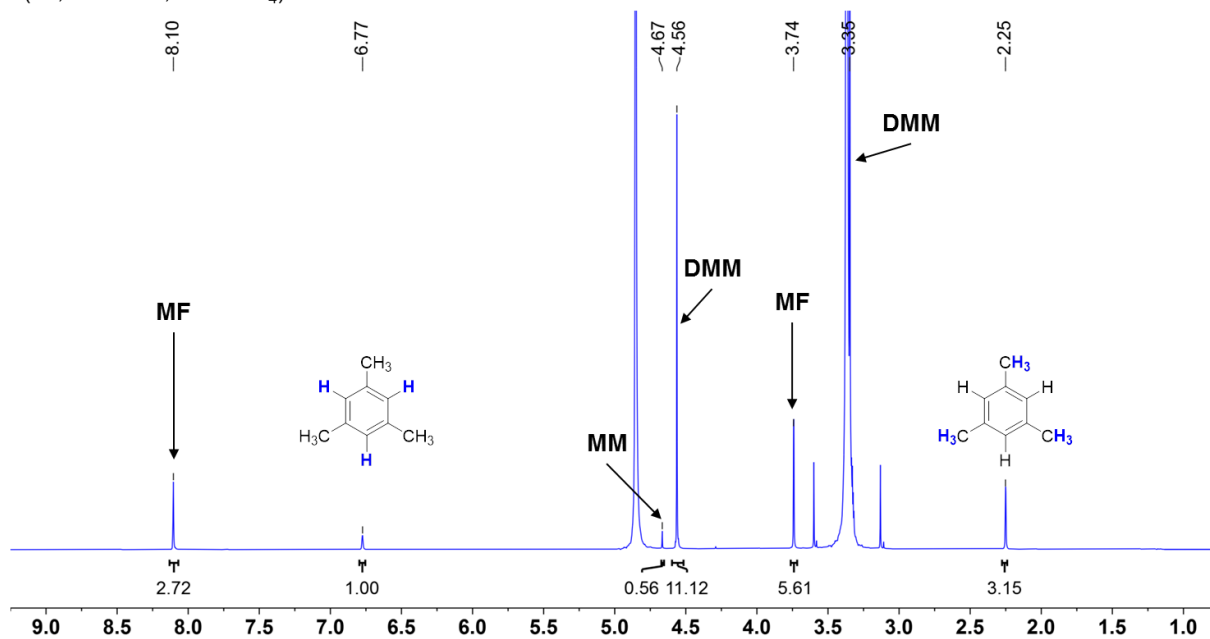

**Figure 8** Representative  $^1\text{H}$  NMR spectrum in  $\text{D}_3\text{COD}$  (300 MHz) of a typical  $\text{CO}_2$  hydrogenation post-reaction mixture after addition of mesitylene as internal standard. MM = Methoxymethane.

**Table 9** Screening of phosphorus ligand additives in CO<sub>2</sub> hydrogenation at low pressure.

$$\text{CO}_2 + \text{H}_2 + \text{CH}_3\text{OH} \xrightarrow[100^\circ\text{C}, 16 \text{ h}]{\begin{array}{c} [\text{Ru}(\text{cod})(\text{methylallyl})_2] \\ \text{triphos} \\ \text{Al}(\text{OTf})_3 \\ \text{additive} \end{array}} \text{CH}_3\text{OCHO} + \text{CH}_3\text{OCOC}_2\text{H}_5$$

| Entry             | Additive                                                          | TON <sup>[b]</sup> |     |
|-------------------|-------------------------------------------------------------------|--------------------|-----|
|                   |                                                                   | MF                 | DMM |
| 1                 | -                                                                 | 18                 | 4   |
| 2                 | PPh <sub>3</sub>                                                  | 21                 | 32  |
| 3                 | P( <i>p</i> -Tol) <sub>3</sub>                                    | 21                 | 32  |
| 4                 | P(4-MeOC <sub>6</sub> H <sub>4</sub> ) <sub>3</sub>               | 21                 | 29  |
| 5                 | P(4-CF <sub>3</sub> OC <sub>6</sub> H <sub>4</sub> ) <sub>3</sub> | 28                 | 13  |
| 6                 | P( <i>o</i> -Tol) <sub>3</sub>                                    | 17                 | 4   |
| 7                 | PCy <sub>3</sub>                                                  | 9                  | 1   |
| 8                 | P <sup><i>t</i></sup> Bu <sub>3</sub>                             | 5                  | 1   |
| 9                 | P(OPh) <sub>3</sub>                                               | 18                 | 46  |
| 10 <sup>[a]</sup> | P(OPh) <sub>3</sub>                                               | 24                 | 46  |

General conditions: [Ru] (12.5 μmol), triphos (12.5 μmol), Al(OTf)<sub>3</sub> (25 μmol), additive (25 μmol), MeOH (2 mL), CO<sub>2</sub> (20 bar), H<sub>2</sub> (30 bar), 100°C, 16 h; [a] [Ru] = 1 (12.5 μmol); [b] determined by <sup>1</sup>H NMR using mesitylene as internal standard.

**Table 10** Effect of pressure and catalyst loading in CO<sub>2</sub> hydrogenation in presence of P(OPh)<sub>3</sub>.

$$\text{CO}_2 + \text{H}_2 + \text{CH}_3\text{OH} \xrightarrow[100^\circ\text{C}, 16 \text{ h}]{\begin{array}{c} [\text{Ru}] \\ \text{Al}(\text{OTf})_3, \\ \text{P}(\text{OPh})_3 \end{array}} \text{CH}_3\text{OCHO} + \text{CH}_3\text{OCOC}_2\text{H}_5$$

| Entry            | [Ru]                                                         | P(OPh) <sub>3</sub><br>[μmol] | TON <sup>[b]</sup> |        |
|------------------|--------------------------------------------------------------|-------------------------------|--------------------|--------|
|                  |                                                              |                               | MF                 | DMM    |
| 1                | 1                                                            | 0                             | 114                | 51     |
| 2                | 1                                                            | 25                            | 105                | 55     |
| 3                | [Ru(cod)(methylallyl) <sub>2</sub> ]/triphos                 | 25                            | traces             | traces |
| 4 <sup>[a]</sup> | 1                                                            | 12                            | 125                | 68     |
| 5 <sup>[a]</sup> | [RuH <sub>2</sub> (PPh <sub>3</sub> ) <sub>4</sub> ]/triphos | 0                             | 161                | 168    |

General conditions: [Ru] (12.5 μmol), Al(OTf)<sub>3</sub> (25 μmol), MeOH (2 mL), CO<sub>2</sub> (20 bar), H<sub>2</sub> (60 bar), 100°C, 16 h; [a] [Ru] (6.0 μmol), Al(OTf)<sub>3</sub> (12 μmol); [b] determined by <sup>1</sup>H NMR using mesitylene as internal standard.

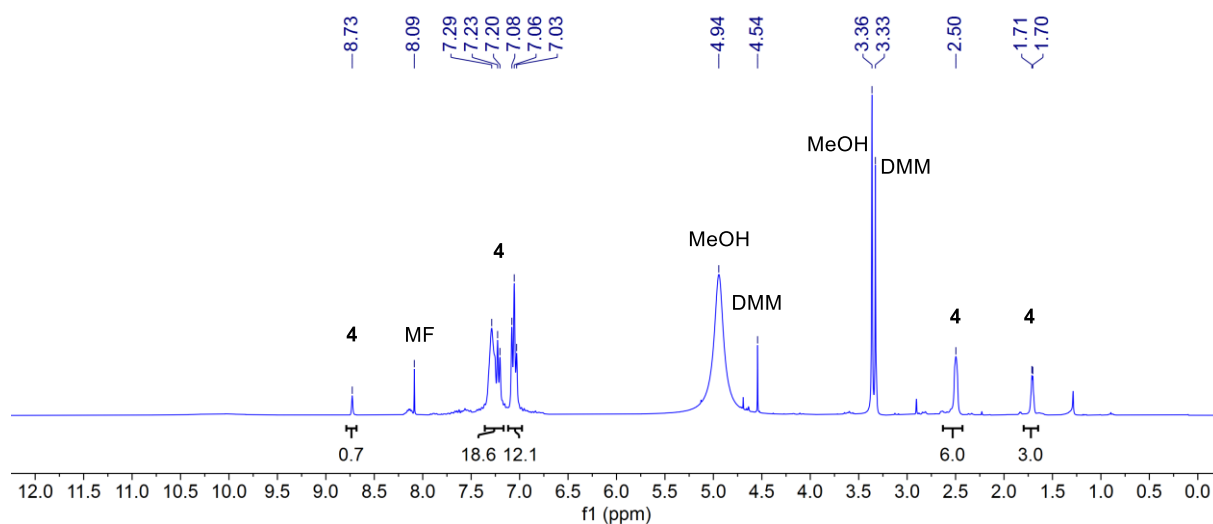

**Figure 9**  $^1\text{H}$  NMR (300 MHz,  $\text{D}_3\text{COD}$ ) spectrum of the post-reaction mixture of a  $\text{CO}_2$  hydrogenation experiment after evaporation,  $[\text{Ru}] = \mathbf{1}$  (50  $\mu\text{mol}$ ),  $\text{Al}(\text{OTf})_3$  (200  $\mu\text{mol}$ ), MeOH (10 mL),  $p(\text{CO}_2) = 20$  bar,  $p(\text{H}_2) = 100$  bar,  $100^\circ\text{C}$ , 16 h.

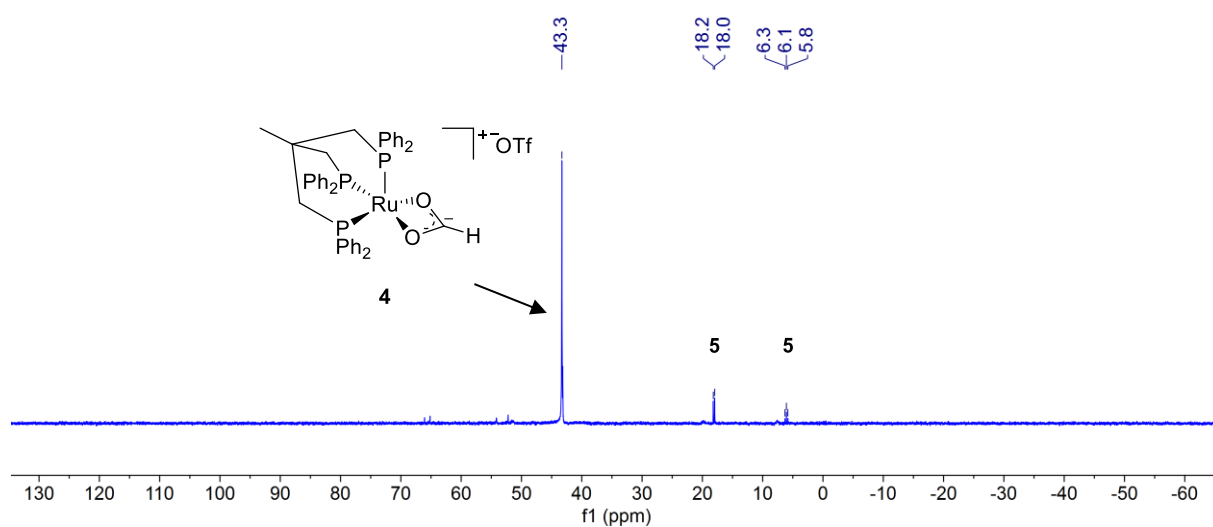

**Figure 10**  $^{31}\text{P}$  NMR (121 MHz,  $\text{D}_3\text{COD}$ ) spectrum of the post-reaction mixture of a  $\text{CO}_2$  hydrogenation experiment after evaporation,  $[\text{Ru}] = \mathbf{1}$  (50  $\mu\text{mol}$ ),  $\text{Al}(\text{OTf})_3$  (200  $\mu\text{mol}$ ), MeOH (10 mL),  $p(\text{CO}_2) = 20$  bar,  $p(\text{H}_2) = 100$  bar,  $100^\circ\text{C}$ , 16 h.

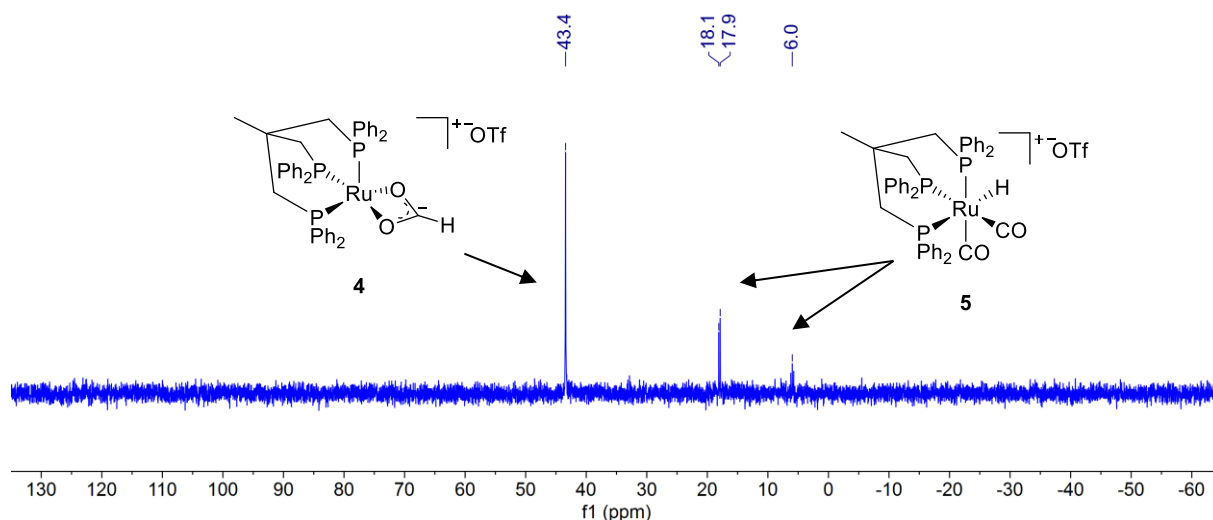

**Figure 11**  $^{31}\text{P}$  NMR (121 MHz,  $\text{D}_3\text{COD}$ ) spectrum of the post-reaction mixture of a  $\text{CO}_2$  hydrogenation experiment,  $[\text{Ru}] = [\text{Ru}(\text{cod})(2\text{-methylallyl})_2]$  (50  $\mu\text{mol}$ ), triphos (50  $\mu\text{mol}$ ),  $\text{Al}(\text{OTf})_3$  (200  $\mu\text{mol}$ ),  $\text{MeOH}$  (10 mL),  $p(\text{CO}_2) = 20$  bar,  $p(\text{H}_2) = 100$  bar,  $100^\circ\text{C}$ , 16 h.

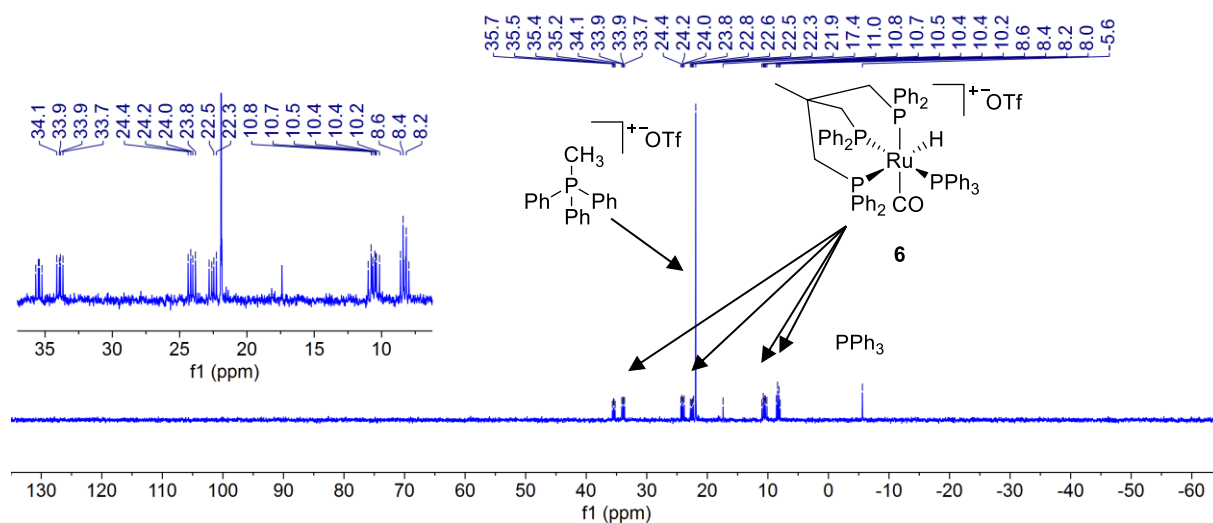

**Figure 12**  $^{31}\text{P}$  NMR (121 MHz,  $\text{D}_3\text{COD}$ ) spectrum of the post-reaction mixture of a  $\text{CO}_2$  hydrogenation experiment,  $[\text{Ru}] = \mathbf{2}$  (50  $\mu\text{mol}$ ),  $\text{Al}(\text{OTf})_3$  (200  $\mu\text{mol}$ ),  $\text{PPh}_3$  (200  $\mu\text{mol}$ ),  $\text{MeOH}$  (10 mL),  $p(\text{CO}_2) = 20$  bar,  $p(\text{H}_2) = 100$  bar,  $100^\circ\text{C}$ , 16 h.



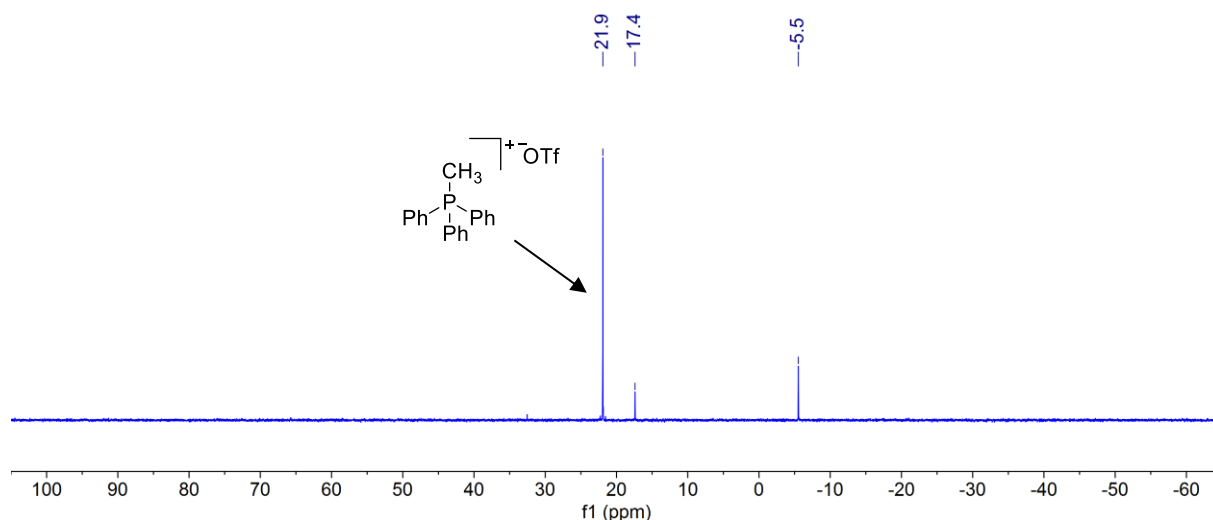

**Figure 13**  $^{31}\text{P}$  NMR (121 MHz,  $\text{D}_3\text{COD}$ ) spectrum of the post-reaction mixture of a  $\text{CO}_2$  hydrogenation experiment,  $\text{Al}(\text{OTf})_3$  (200  $\mu\text{mol}$ ),  $\text{PPh}_3$  (200  $\mu\text{mol}$ ),  $\text{MeOH}$  (10 mL),  $p(\text{CO}_2) = 20$  bar,  $p(\text{H}_2) = 100$  bar,  $100^\circ\text{C}$ , 16 h.

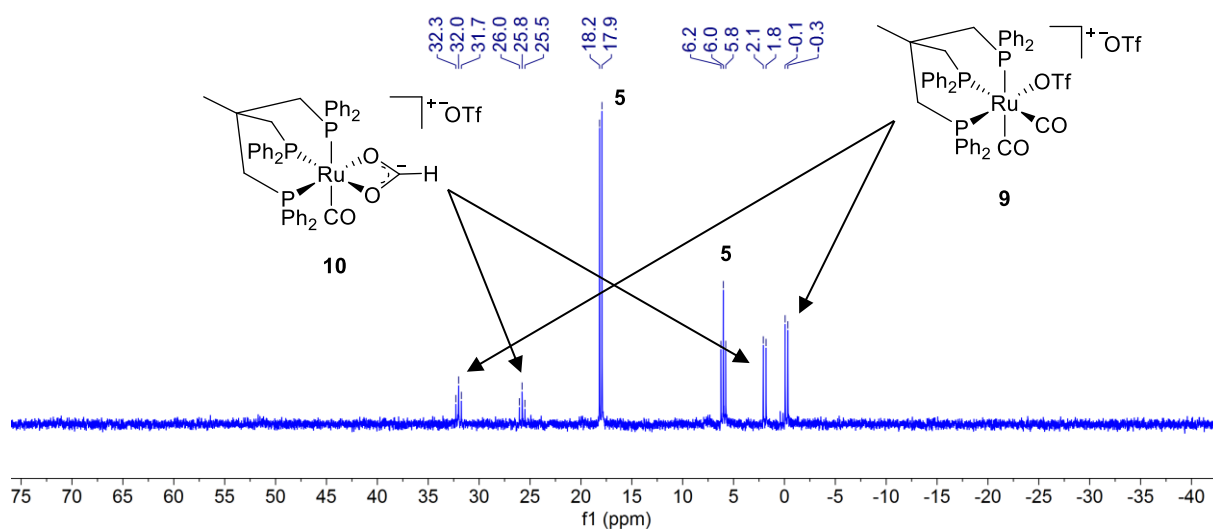

**Figure 14**  $^{31}\text{P}$  NMR (121 MHz,  $\text{D}_3\text{COD}$ ) spectrum of the post-reaction mixture of a  $\text{CO}_2$  hydrogenation experiment,  $[\text{Ru}] = \mathbf{5}$  (12.5  $\mu\text{mol}$ ),  $\text{Al}(\text{OTf})_3$  (50  $\mu\text{mol}$ ),  $\text{MeOH}$  (5 mL),  $p(\text{CO}_2) = 20$  bar,  $p(\text{H}_2) = 100$  bar,  $100^\circ\text{C}$ , 16 h.

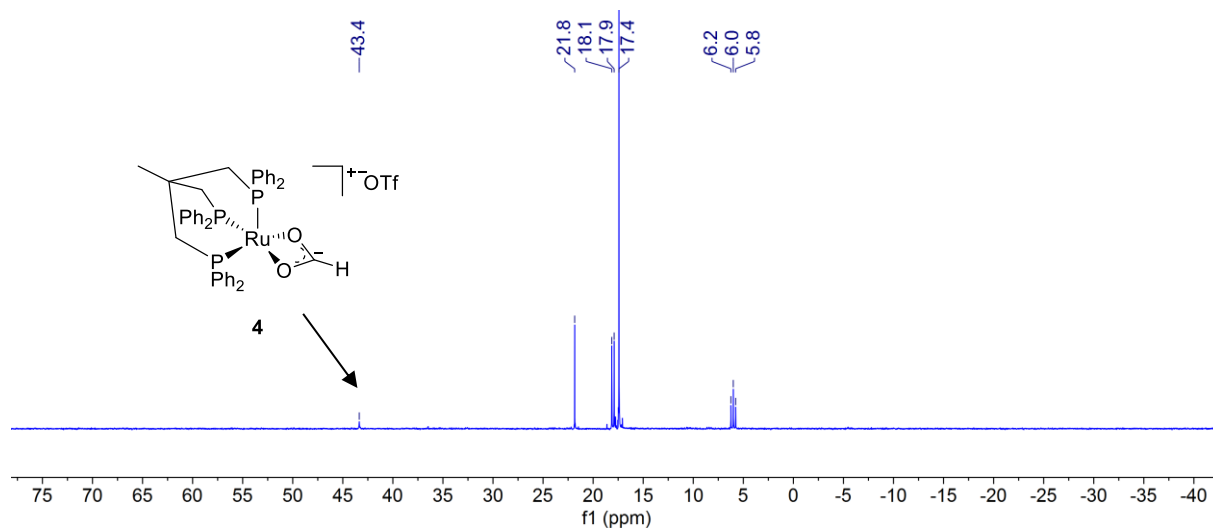

**Figure 15**  $^{31}\text{P}$  NMR (121 MHz,  $\text{D}_3\text{COD}$ ) spectrum of the post-reaction mixture of a  $\text{CO}_2$  hydrogenation experiment,  $[\text{Ru}] = \mathbf{5}$  (12.5  $\mu\text{mol}$ ),  $\text{Al}(\text{OTf})_3$  (50  $\mu\text{mol}$ ),  $\text{PPh}_3$  (50  $\mu\text{mol}$ ),  $\text{MeOH}$  (5 mL),  $p(\text{CO}_2) = 20$  bar,  $p(\text{H}_2) = 100$  bar,  $100^\circ\text{C}$ , 16 h.

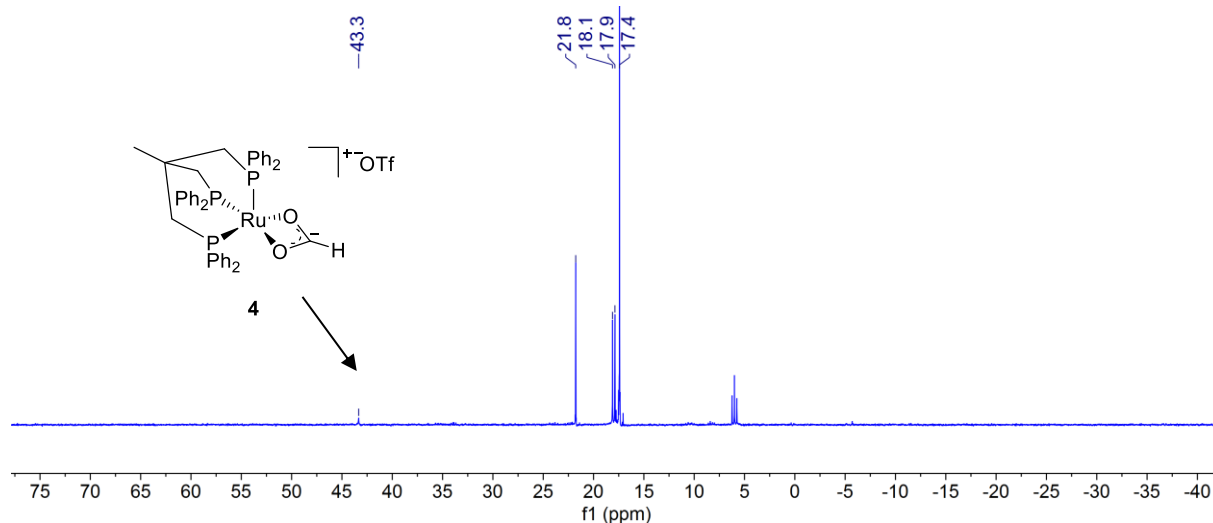

**Figure 16**  $^{31}\text{P}$  NMR (121 MHz,  $\text{D}_3\text{COD}$ ) spectrum of the post-reaction mixture of a  $\text{CO}_2$  hydrogenation experiment,  $[\text{Ru}] = \mathbf{5}$  (12.5  $\mu\text{mol}$ ),  $\text{Al}(\text{OTf})_3$  (50  $\mu\text{mol}$ ),  $[\text{PPh}_3\text{CH}_2\text{OH}]\text{OTf}$  (50  $\mu\text{mol}$ ),  $\text{MeOH}$  (5 mL),  $p(\text{CO}_2) = 20$  bar,  $p(\text{H}_2) = 100$  bar,  $100^\circ\text{C}$ , 16 h.

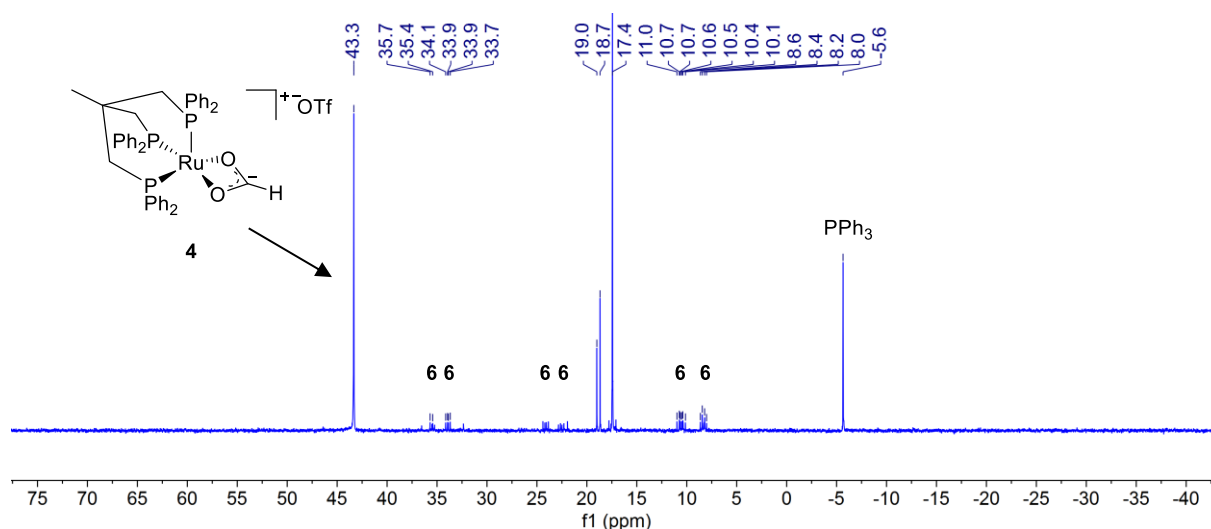

**Figure 17**  $^{31}\text{P}$  NMR (121 MHz,  $\text{D}_3\text{COD}$ ) spectrum of the post-reaction mixture of a  $\text{CO}_2$  hydrogenation experiment,  $[\text{Ru}] = 1$  (12.5  $\mu\text{mol}$ ),  $[\text{PPh}_3\text{CH}_2\text{OH}]\text{OTf}$  (50  $\mu\text{mol}$ ), MeOH (5 mL),  $p(\text{CO}_2) = 20$  bar,  $p(\text{H}_2) = 100$  bar,  $100^\circ\text{C}$ , 16 h.

### *In-situ* NMR study of **5** in the presence of $\text{P}(\text{OPh})_3$ and $\text{H}_2$

A high-pressure NMR tube was charged with a 0.6 mL  $\text{D}_3\text{COD}$  solution containing Ru-complex **5** (13.0 mg, 12.5  $\mu\text{mol}$ ) and  $\text{P}(\text{OPh})_3$  (7.8 mg, 25  $\mu\text{mol}$ ). After 1 h at  $100^\circ\text{C}$ , a  $^{31}\text{P}$  NMR spectrum was recorded at  $25^\circ\text{C}$  (Figure 15 a). After pressurizing with 10 bar of  $\text{H}_2$ , the solution was heated to  $100^\circ\text{C}$  in an oil bath for 24 h. The mixture was cooled to room temperature and another  $^{31}\text{P}$  NMR spectrum was recorded (Figure 15 b).

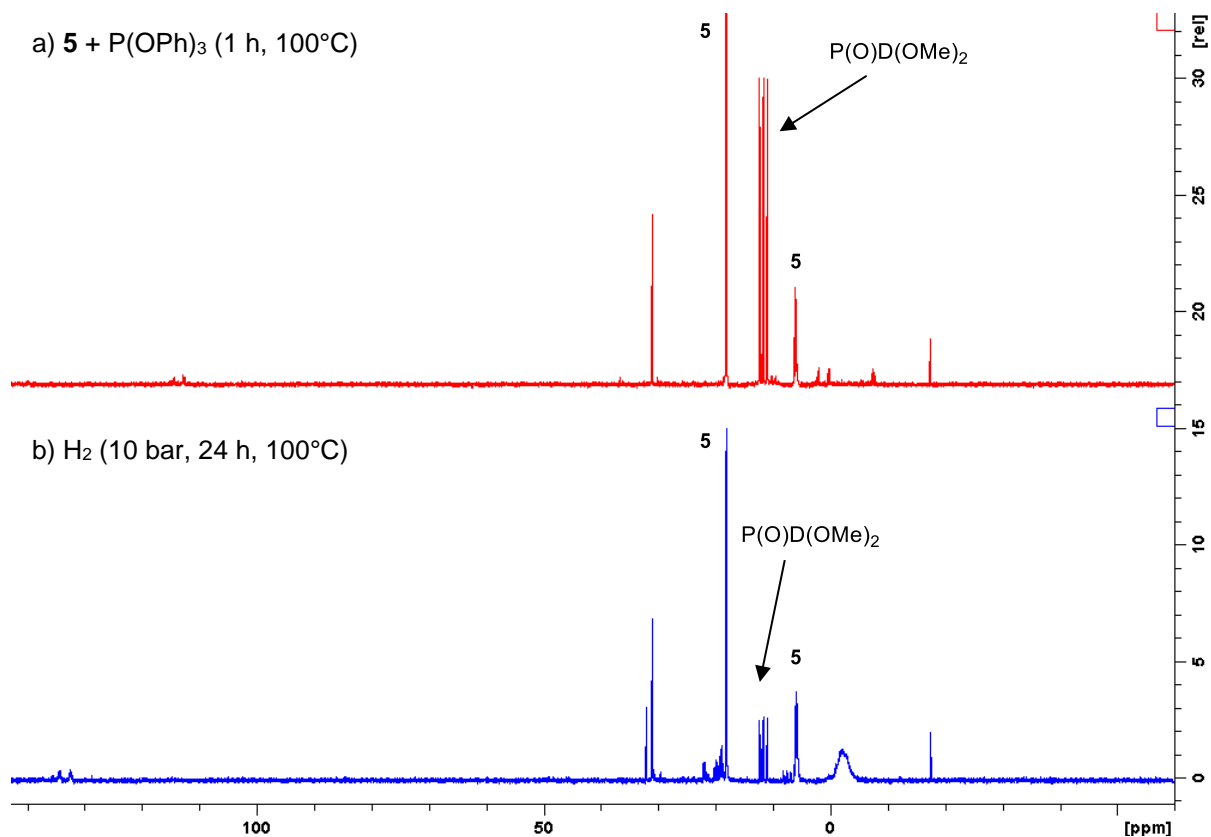

**Figure 18**  $^{31}\text{P}$  NMR (162 MHz,  $\text{D}_3\text{COD}$ ) spectra of a) **5** (12.5  $\mu\text{mol}$ ) and  $\text{P}(\text{OPh})_3$  (25.0  $\mu\text{mol}$ ) in 0.6 mL of  $\text{D}_3\text{COD}$  after 1 h at  $100^\circ\text{C}$  and b) after 24 h at  $p(\text{H}_2) = 10$  bar,  $100^\circ\text{C}$ .

## General procedure for catalyst recycling experiments

All volatiles of the mixture obtained as in the described general procedure were removed *in vacuo* at 40°C. The remaining solid was transferred into a glovebox and dissolved in MeOH. The mixture was transferred back into a Teflon insert and placed into a stainless steel 40 mL Premex autoclave. The subsequent cycle was performed as described in the general CO<sub>2</sub> hydrogenation procedure.

## Recycling of catalyst system 1/Al(OTf)<sub>3</sub> without additive

**Table 11** Catalyst recycling using 1/Al(OTf)<sub>3</sub>.

| Entry | Al(OTf) <sub>3</sub><br>[μmol] | TON <sup>[a]</sup> |     | Selectivity <sub>DMM</sub> <sup>[a]</sup> |
|-------|--------------------------------|--------------------|-----|-------------------------------------------|
|       |                                | MF                 | DMM |                                           |
| Run 1 | 200                            | 52                 | 206 | 80%                                       |
| Run 2 | -                              | 50                 | 209 | 81%                                       |
| Run 3 | -                              | 54                 | 207 | 79%                                       |

General conditions: [Ru] = **1** (50 μmol), MeOH (10 mL), CO<sub>2</sub> (20 bar), H<sub>2</sub> (100 bar), 100°C, 16 h; [a] determined by <sup>1</sup>H NMR using mesitylene as internal standard.

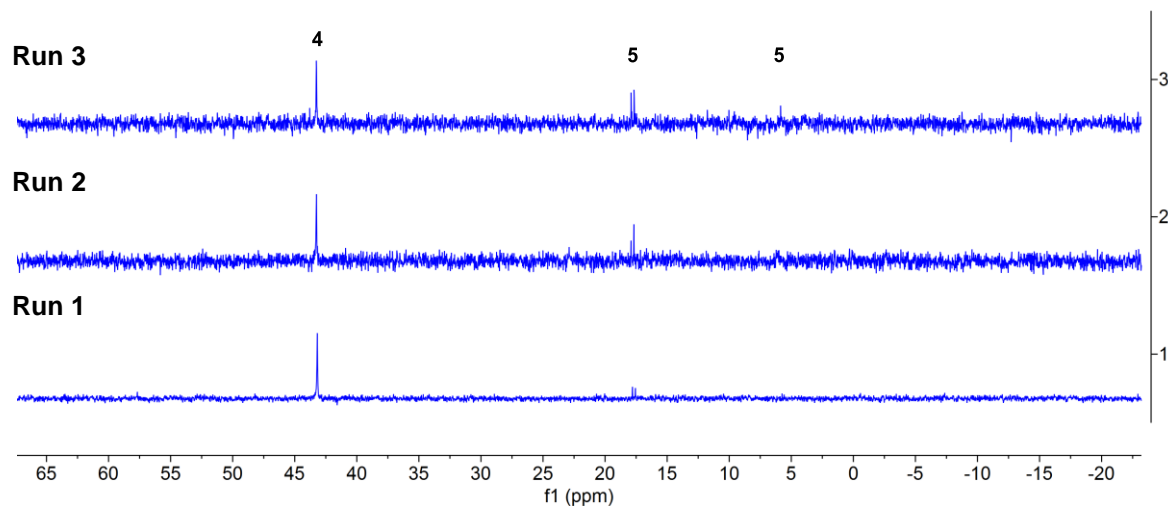

**Figure 19** <sup>31</sup>P NMR (121 MHz, D<sub>3</sub>COD) spectra of post-reaction mixtures in CO<sub>2</sub> hydrogenation recycling experiments, [Ru] = **1** (50 μmol) in run 1, Al(OTf)<sub>3</sub> (200 μmol) in run 1, MeOH (10 mL), *p*(CO<sub>2</sub>) = 20 bar, *p*(H<sub>2</sub>) = 100 bar, 100°C, 16 h.

## Recycling of catalyst system 3/ $\text{Al}(\text{OTf})_3$ without additive

**Table 12** Catalyst recycling using 3/ $\text{Al}(\text{OTf})_3$ .

| Entry | $\text{Al}(\text{OTf})_3$<br>[ $\mu\text{mol}$ ] | TON <sup>[a]</sup> |     | Selectivity <sub>DMM</sub> <sup>[a]</sup> |
|-------|--------------------------------------------------|--------------------|-----|-------------------------------------------|
|       |                                                  | MF                 | DMM |                                           |
| Run 1 | 200                                              | 62                 | 283 | 82%                                       |
| Run 2 | -                                                | 58                 | 261 | 82%                                       |
| Run 3 | -                                                | 50                 | 219 | 81%                                       |

General conditions: [Ru] = **3** (50  $\mu\text{mol}$ ), MeOH (10 mL),  $\text{CO}_2$  (20 bar),  $\text{H}_2$  (100 bar), 100°C, 16 h; [a] determined by  $^1\text{H}$  NMR using mesitylene as internal standard.

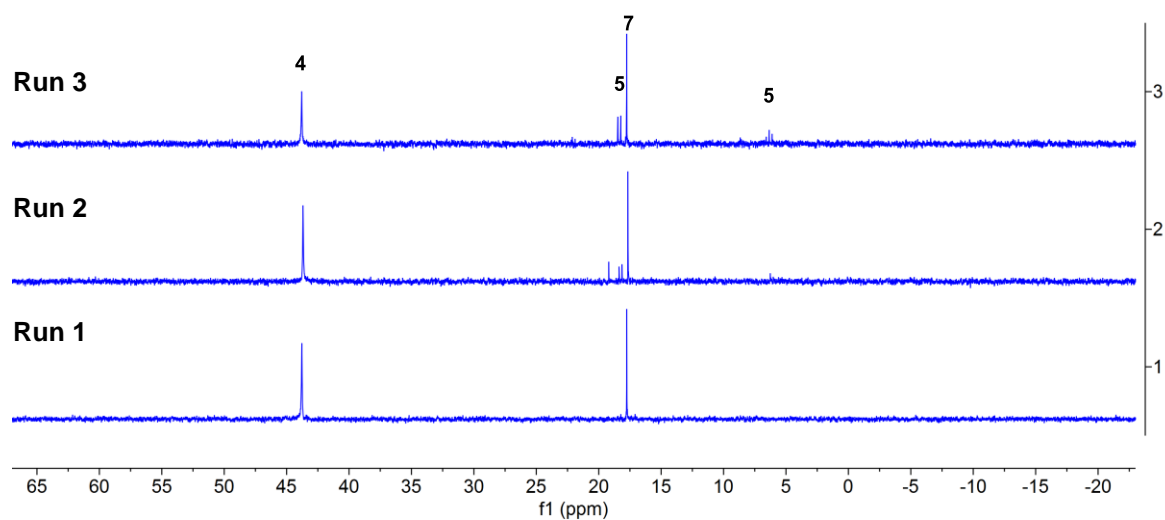

**Figure 20**  $^{31}\text{P}$  NMR (121 MHz,  $\text{D}_3\text{COD}$ ) spectra of post-reaction mixtures in  $\text{CO}_2$  hydrogenation recycling experiments, [Ru] = **3** (50  $\mu\text{mol}$ ) in run 1,  $\text{Al}(\text{OTf})_3$  (200  $\mu\text{mol}$ ) in run 1, MeOH (10 mL),  $p(\text{CO}_2)$  = 20 bar,  $p(\text{H}_2)$  = 100 bar, 100°C, 16 h.

### Recycling of catalyst system 3/ $\text{Al}(\text{OTf})_3$ without additive at low catalyst loading

**Table 13** Catalyst recycling using 3/ $\text{Al}(\text{OTf})_3$  at low catalyst loading.

| Entry | $\text{Al}(\text{OTf})_3$<br>[ $\mu\text{mol}$ ] | $\text{TON}^{[a]}$ |      | Selectivity $_{\text{DMM}}^{[a]}$ |
|-------|--------------------------------------------------|--------------------|------|-----------------------------------|
|       |                                                  | MF                 | DMM  |                                   |
| Run 1 | 25                                               | 506                | 1176 | 70%                               |
| Run 2 | -                                                | 599                | 908  | 60%                               |
| Run 3 | -                                                | 626                | 577  | 48%                               |

General conditions: [Ru] = **3** (3.1  $\mu\text{mol}$ ), MeOH (5 mL),  $\text{CO}_2$  (20 bar),  $\text{H}_2$  (100 bar), 100°C, 24 h; [a] determined by  $^1\text{H}$  NMR using mesitylene as internal standard.

### Recycling of catalyst system 1/ $\text{Al}(\text{OTf})_3$ with additives $\text{PPh}_3$ and $\text{HCOOH}$

**Table 14** Catalyst recycling using 1/ $\text{Al}(\text{OTf})_3$  in the presence of  $\text{PPh}_3$  and  $\text{HCOOH}$ .

| Entry | $\text{Al}(\text{OTf})_3$<br>[ $\mu\text{mol}$ ] | $\text{PPh}_3$<br>[ $\mu\text{mol}$ ] | $\text{HCOOH}$<br>[ $\mu\text{mol}$ ] | $\text{TON}^{[a]}$ |     | Selectivity $_{\text{DMM}}^{[a]}$ |
|-------|--------------------------------------------------|---------------------------------------|---------------------------------------|--------------------|-----|-----------------------------------|
|       |                                                  |                                       |                                       | MF                 | DMM |                                   |
| Run 1 | 200                                              | 200                                   | 200                                   | 52                 | 220 | 81%                               |
| Run 2 | -                                                | -                                     | 200                                   | 59                 | 241 | 80%                               |
| Run 3 | -                                                | -                                     | 200                                   | 62                 | 239 | 79%                               |
| Run 4 | -                                                | -                                     | 200                                   | 60                 | 216 | 79%                               |
| Run 5 | -                                                | -                                     | 200                                   | 65                 | 211 | 76%                               |

General conditions: [Ru] = **1** (50  $\mu\text{mol}$ ), MeOH (10 mL),  $\text{CO}_2$  (20 bar),  $\text{H}_2$  (100 bar), 100°C, 16 h; [a] determined by  $^1\text{H}$  NMR using mesitylene as internal standard.

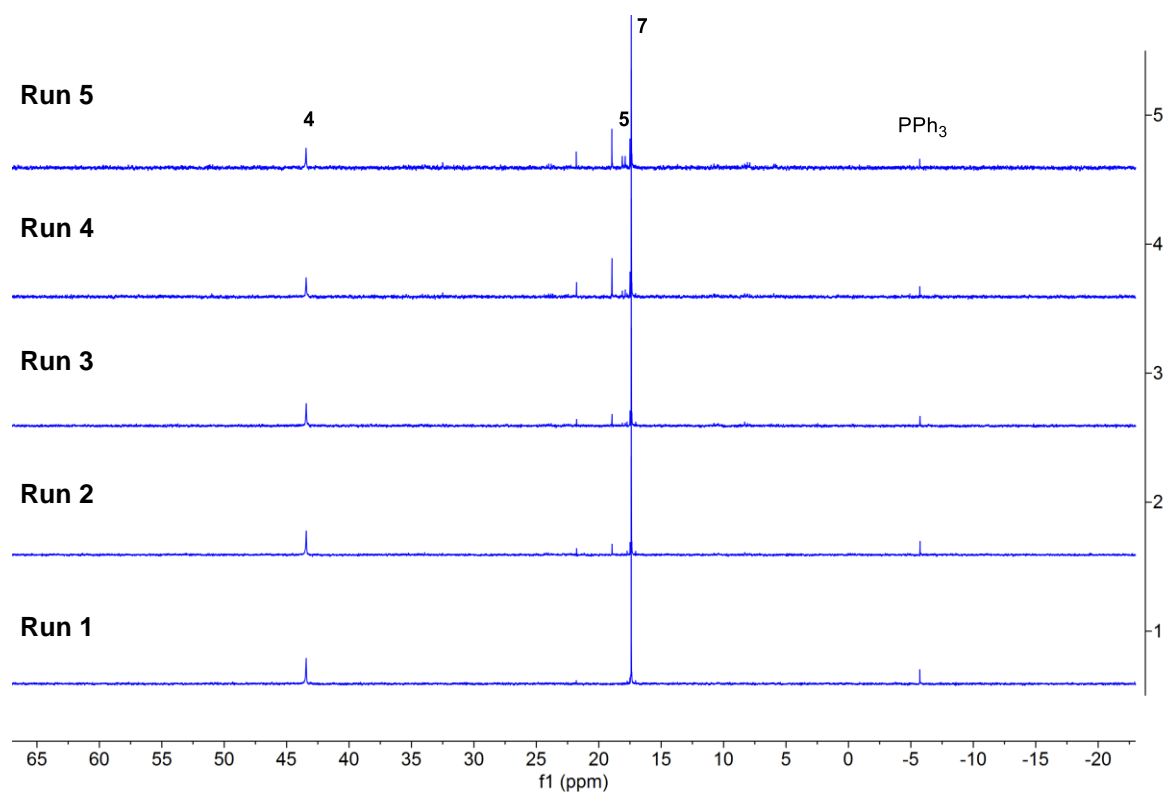

**Figure 21**  $^{31}\text{P}$  NMR (121 MHz,  $\text{D}_3\text{COD}$ ) spectra of post-reaction mixtures in  $\text{CO}_2$  hydrogenation recycling experiments,  $[\text{Ru}] = 1$  (50  $\mu\text{mol}$ ) in run 1,  $\text{Al}(\text{OTf})_3$  (200  $\mu\text{mol}$ ) in run 1,  $\text{PPh}_3$  (200  $\mu\text{mol}$ ) in run 1,  $\text{HCOOH}$  (200  $\mu\text{mol}$ ),  $\text{MeOH}$  (10 mL),  $p(\text{CO}_2) = 20$  bar,  $p(\text{H}_2) = 100$  bar,  $100^\circ\text{C}$ , 16 h.

## References

1. T. vom Stein, T. Weigand, C. Merkens, J. Klankermayer and W. Leitner, *ChemCatChem*, 2013, **5**, 439-441.
2. E. J. Derrah, M. Hanauer, P. N. Plessow, M. Schelwies, M. K. da Silva and T. Schaub, *Organometallics*, 2015, **34**, 1872-1881.
3. A. Phanopoulos, N. J. Brown, A. J. White, N. J. Long and P. W. Miller, *Inorg. Chem.*, 2014, **53**, 3742-3752.
4. W. O. Siegl, S. J. Lapporte and J. P. Collman, *Inorg. Chem.*, 1973, **12**, 674-677.
5. W. Tückmantel, K. Oshima and K. Utimoto, *Tetrahedron Lett.*, 1986, **27**, 5617-5618.
6. S. I. Hommeltoft and M. C. Baird, *Organometallics*, 1986, **5**, 190-195.
7. N. Westhues and J. Klankermayer, *ChemCatChem*, 2019, **11**, 3371-3375.
8. D. J. Burton and D. M. Wiemers, *J. Fluor. Chem.*, 1985, **27**, 85-89.
